# Supplementary material for: Effects of preservation method on canine (Canis lupus familiaris) fecal microbiota
Source: PubMed Central journal article supplement (PMC5970549; doi:10.7717/peerj.4827), 2018-05-23

### 25°C

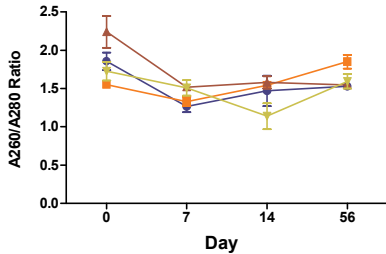

### 4°C

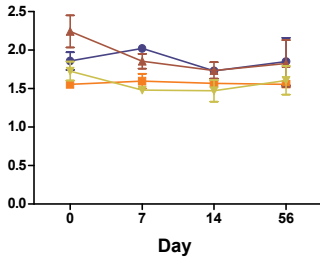

### -80°C

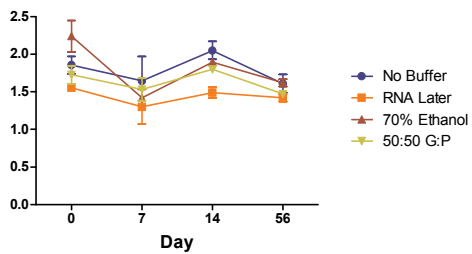

Supplement: peerj-06-4827-s001.pdf [file peerj-06-4827-s001.pdf]
