# Supplementary material for: Effects of preservation method on canine (Canis lupus familiaris) fecal microbiota
Source: PubMed Central journal article supplement (PMC5970549; doi:10.7717/peerj.4827), 2018-05-23
Supplement: peerj-06-4827-s002.pdf [file peerj-06-4827-s002.pdf]

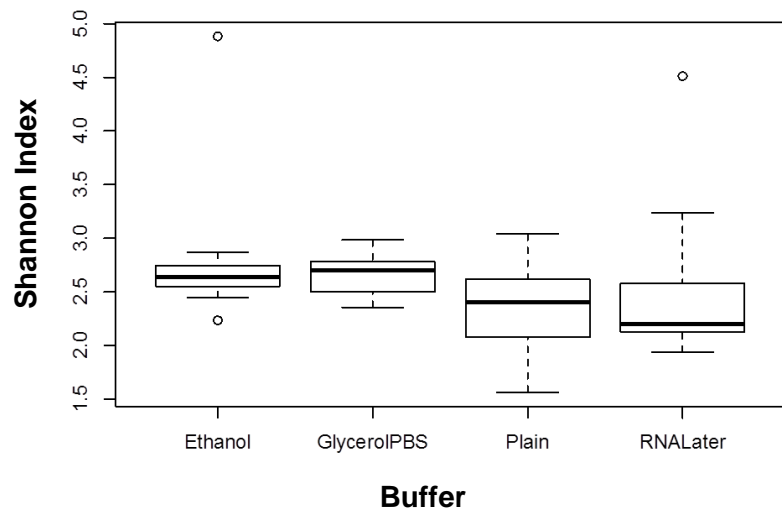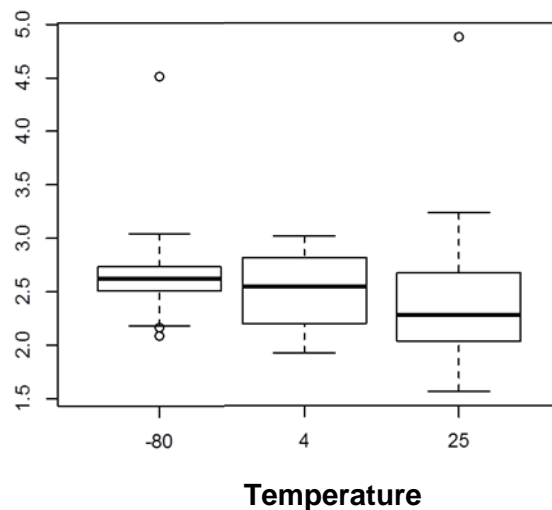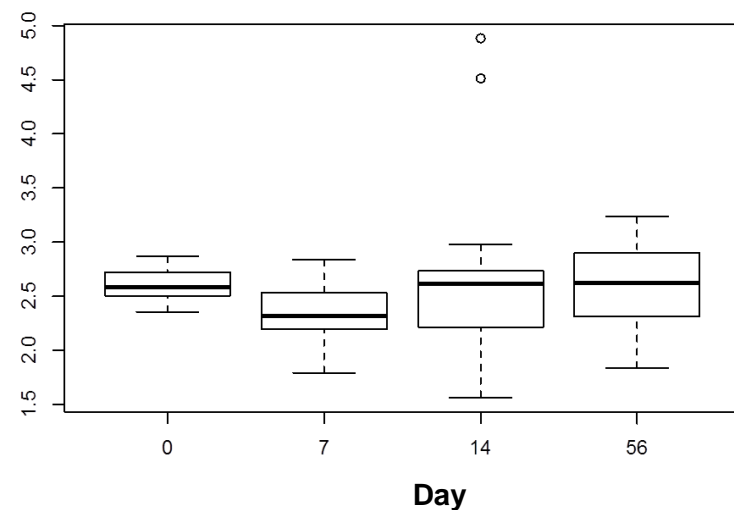

| Variables                  | Df | Sum Sq | Mean Sq | F value | Pr(>F)   |
|----------------------------|----|--------|---------|---------|----------|
| Buffer                     | 3  | 1.884  | 0.6281  | 3.073   | 0.0339 * |
| Temperature                | 1  | 0.451  | 0.451   | 2.206   | 0.1424   |
| Day                        | 1  | 0.142  | 0.142   | 0.693   | 0.4081   |
| Buffer x Temperature       | 3  | 1.153  | 0.3843  | 1.880   | 0.1419   |
| Buffer x Day               | 3  | 0.572  | 0.1907  | 0.933   | 0.4302   |
| Temperature x Day          | 1  | 0.116  | 0.1162  | 0.568   | 0.4536   |
| Buffer x Temperature x Day | 3  | 0.612  | 0.2041  | 0.998   | 0.3995   |
