# Supplementary material for: Effects of preservation method on canine (Canis lupus familiaris) fecal microbiota
Source: PubMed Central journal article supplement (PMC5970549; doi:10.7717/peerj.4827), 2018-05-23
Supplement: peerj-06-4827-s003.pdf [file peerj-06-4827-s003.pdf]

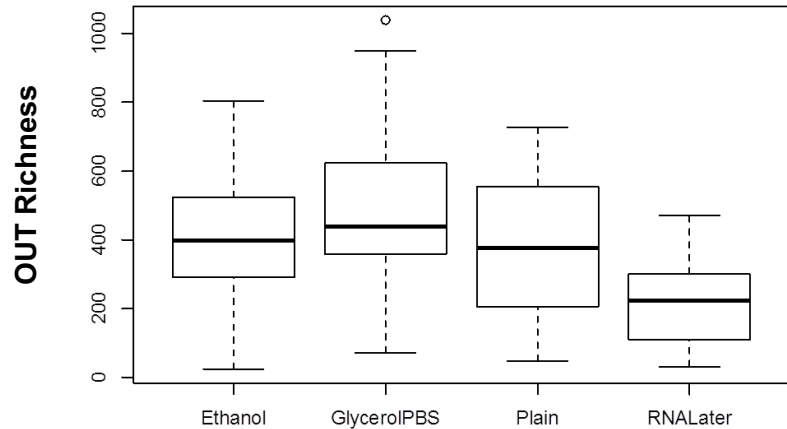

**Buffer**

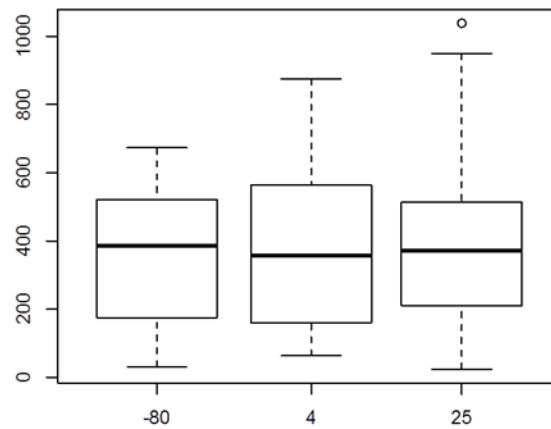

**Temperature**

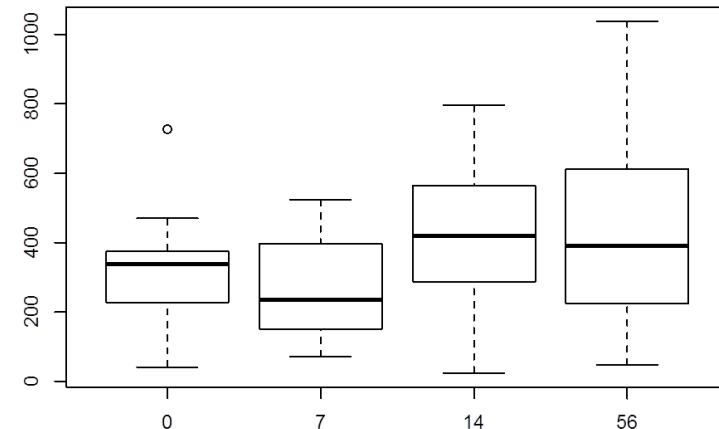

**Day**

| <b>Variables</b>           | <b>Df</b> | <b>Sum Sq</b> | <b>Mean Sq</b> | <b>F value</b> | <b>Pr(&gt;F)</b> |
|----------------------------|-----------|---------------|----------------|----------------|------------------|
| Buffer                     | 3         | 921397        | 307132         | 12.421         | 0.000001 ***     |
| Temperature                | 1         | 20793         | 20793          | 0.841          | 0.362580         |
| Day                        | 1         | 268202        | 268202         | 10.846         | 0.001620 **      |
| Buffer x Temperature       | 3         | 255404        | 85135          | 3.443          | 0.021800 *       |
| Buffer x Day               | 3         | 716960        | 238987         | 9.665          | 0.000024 ***     |
| Temperature x Day          | 1         | 54120         | 54120          | 2.189          | 0.143940         |
| Buffer x Temperature x Day | 3         | 183684        | 61228          | 2.476          | 0.069330         |
