# Supplementary material for: Effects of preservation method on canine (Canis lupus familiaris) fecal microbiota
Source: PubMed Central journal article supplement (PMC5970549; doi:10.7717/peerj.4827), 2018-05-23
Supplement: peerj-06-4827-s004.pdf [file peerj-06-4827-s004.pdf]

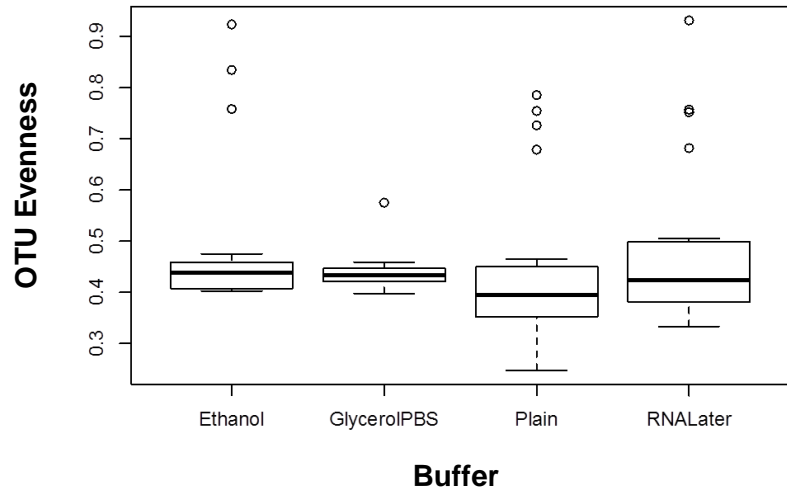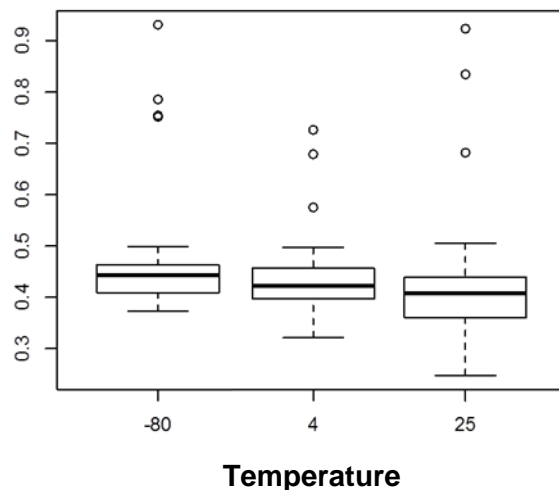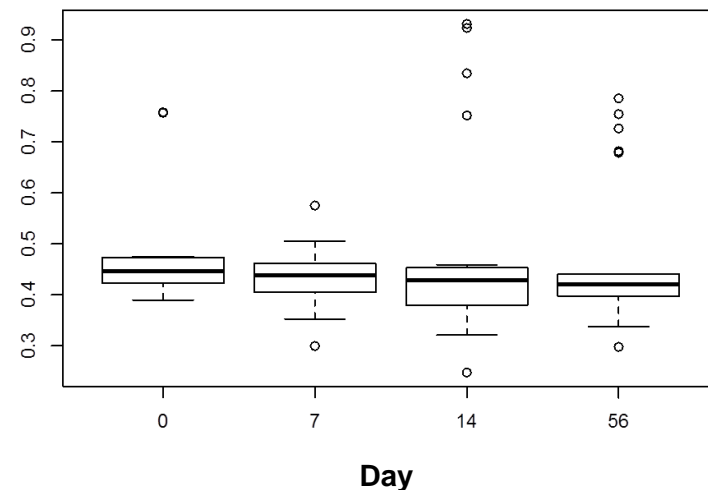

| Variables                  | Df | Sum Sq | Mean Sq | F value | Pr(>F)     |
|----------------------------|----|--------|---------|---------|------------|
| Buffer                     | 3  | 0.0440 | 0.01466 | 1.027   | 0.38654    |
| Temperature                | 1  | 0.0327 | 0.03273 | 2.294   | 0.13481    |
| Day                        | 1  | 0.0003 | 0.00029 | 0.020   | 0.88667    |
| Buffer x Temperature       | 3  | 0.1702 | 0.05674 | 3.976   | 0.01161 *  |
| Buffer x Day               | 3  | 0.2091 | 0.06970 | 4.884   | 0.00404 ** |
| Temperature x Day          | 1  | 0.0014 | 0.00135 | 0.095   | 0.75933    |
| Buffer x Temperature x Day | 3  | 0.1314 | 0.04381 | 3.070   | 0.03402 *  |
