# Supplementary material for: Effects of preservation method on canine (Canis lupus familiaris) fecal microbiota
Source: PubMed Central journal article supplement (PMC5970549; doi:10.7717/peerj.4827), 2018-05-23

# Qubit vs. Nanodrop

## 25°C

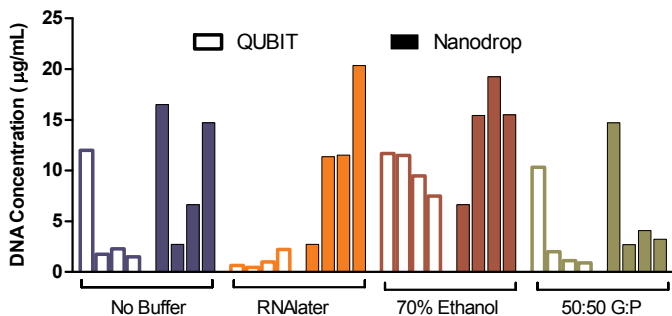

## 4°C

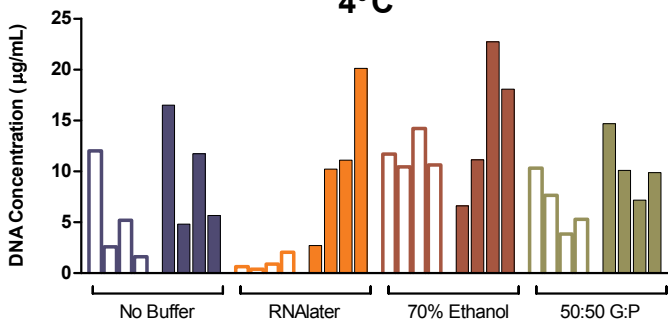

## -80°C

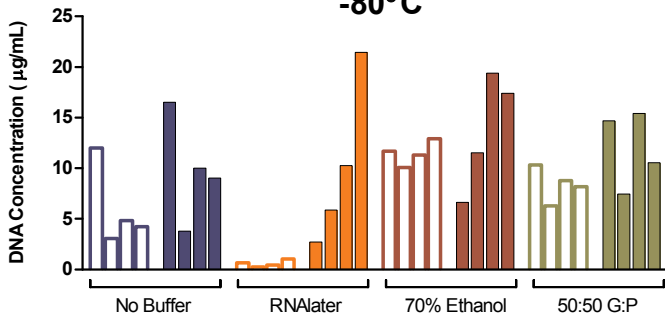

Supplement: peerj-06-4827-s006.pdf [file peerj-06-4827-s006.pdf]
